# Supplementary material
Source: PubMed Central journal article supplement (PMC9233991)
Supplement: 10038_2022_1013_MOESM2_ESM.pdf [file 10038_2022_1013_MOESM2_ESM.pdf]

### Self-reported Potential Conflict of Interest of Authors

The following relationships must be disclosed to the JHG editorial office:

1. Employment. The name and nature of all employers must be disclosed.

no, yes (name of employers: TH, MS, MH, MS, YY and KT are employees of OncoTherapy Science, Inc.)

2. Membership on the board of directors or any fiduciary relationship with another organization.

no, yes (name of organization: )

3. Membership on a scientific advisory panel or other standing scientific/medical committees of another organization.

no, yes (name of organization: )

These authors, their spouse, their relatives in the first degree, or persons who share income/assets with authors have the potential conflict of interest described below. The lower limits of money (April to March of the most recent one year) which should be reported are demonstrated in JHG's conflict of interest policy.

|                                                                                                                           | Leadership Position/Advisory Role | Stock                     | Royalty          | Lecture's Fee  | Manuscript Fee | Research Funds   | Other         |
|---------------------------------------------------------------------------------------------------------------------------|-----------------------------------|---------------------------|------------------|----------------|----------------|------------------|---------------|
| Yen amount                                                                                                                | $\geq 1,000,000$                  | $\geq 1,000,000$          | $\geq 1,000,000$ | $\geq 500,000$ | $\geq 500,000$ | $\geq 1,000,000$ | $\geq 50,000$ |
| Tetsuro Hikichi<br>Michiko Sakamoto<br>Makiko Harada<br>Maki Saito<br>Yuka Yamane<br>Kimihiwa Tokumura<br>Yusuke Nakamura | OncoTherapy Science, Inc.         | OncoTherapy Science, Inc. |                  |                |                |                  |               |

\* ¥1,000,000-4,999,999

\*\* ¥5,000,000-9,999,999

# ¥10,000,000 $\leq$
